# Supplementary material
Source: PubMed Central journal article supplement (PMC6582399)
Supplement: 761628_Supplemental_material.pdf [file 761628_Supplemental_material.pdf]

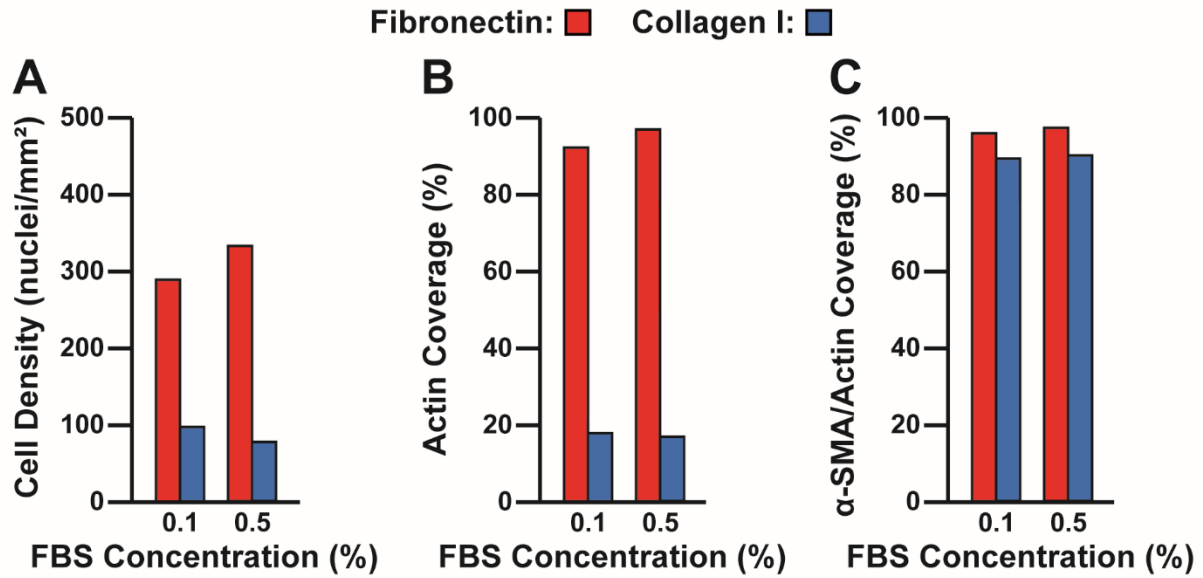

**Supplementary Figure S1. Optimization of ECM ligand and serum concentration for human cardiac fibroblast culture.** Human cardiac fibroblasts were seeded onto high PDMS-coated coverslips coated with the indicated ECM ligand. After one day, serum levels were reduced to the indicated levels and cells were treated with 10 ng/mL TGF- $\beta$ 1 for five days, followed by staining and imaging. Cell density (A), actin coverage (B), and  $\alpha$ -SMA/actin coverage was quantified (n=1).

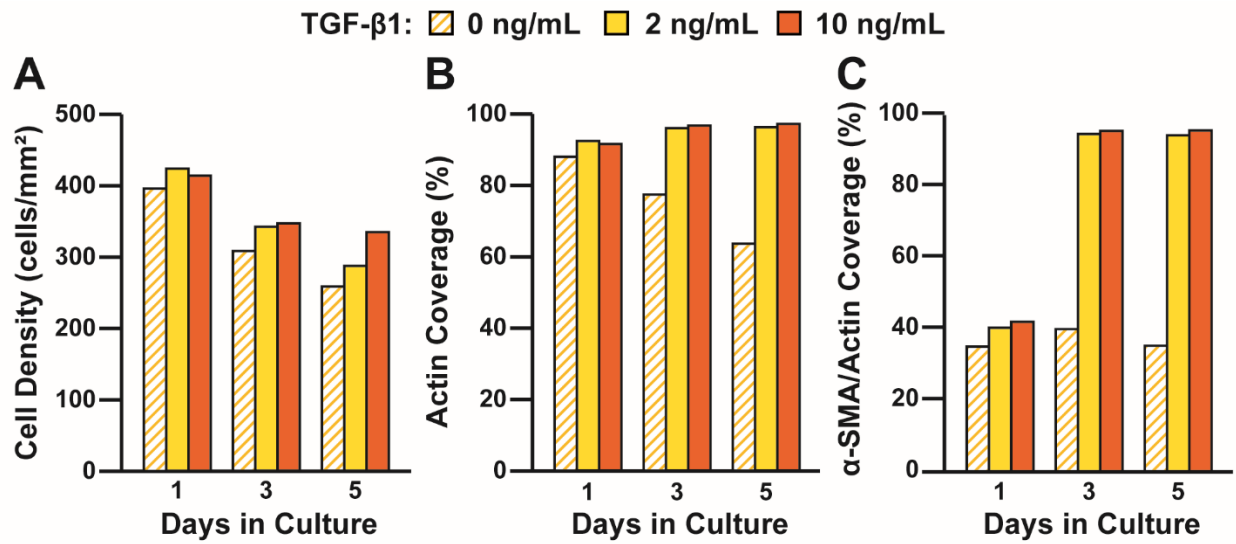

**Supplementary Figure S2. Optimization of TGF- $\beta$ 1 concentration.** Human cardiac fibroblasts were seeded onto high PDMS-coated coverslips coated fibronectin. After one day, serum was reduced to 0.1% and cells were treated with 0, 2, or 10 ng/mL TGF- $\beta$ 1 for one, three, and five days, following by staining and imaging. Cell density (A), actin coverage (B), and  $\alpha$ -SMA/actin coverage was quantified (n=1).

**Supplementary Table S1.** Primers used for RT-PCR. All primers were purchased from BioRad.

| Gene         | Encoded Protein               | Protein Function                      | Unique Assay ID |
|--------------|-------------------------------|---------------------------------------|-----------------|
| <i>ACTA2</i> | $\alpha$ -SMA                 | Contractile microfilament             | qHsaCID0013300  |
| <i>POSTN</i> | Periostin                     | ECM remodeling                        | qHsaCID0023310  |
| <i>FAP</i>   | Fibroblast activation protein | Wound healing                         | qHsaCID0018575  |
| <i>FSP1</i>  | Fibroblast specific protein-1 | Cell motility                         | qHsaCID0013749  |
| <i>GJA1</i>  | Connexin 43                   | Gap junction electrical communication | qHsaCID0012977  |

**Supplementary Table S2. Statistical analysis for cell density.** All data was normally distributed, as determined by the Kolmogorov-Smirnov test, and compared using one-way ANOVA, with *p*-values indicated below.

| Comparison           | Test          | <i>p</i> -value |
|----------------------|---------------|-----------------|
| <i>Subset: Day 1</i> | One-way ANOVA | NS (0.84)       |
| <i>Subset: Day 3</i> | One-way ANOVA | NS (0.42)       |
| <i>Subset: Day 5</i> | One-way ANOVA | NS (0.7)        |

**Supplementary Table S3. Statistical analysis for actin coverage.** All data was normally distributed, as determined by the Kolmogorov-Smirnov test, and compared using one-way ANOVA, with *p*-values indicated below. In timepoints with ANOVA *p*-values <0.05, multiple comparisons were performed with Tukey's test, with *p*-values indicated below.

| Comparison                          | Test          | <i>p</i> -value |
|-------------------------------------|---------------|-----------------|
| <i>Subset: Day 1</i>                | One-way ANOVA | NS (0.41)       |
| <i>Subset: Day 3</i>                | One-way ANOVA | 6.60*10e-4      |
| Low, -TGFB vs. Moderate, -TGFB      | Tukey's test  | NS              |
| Low, -TGFB vs. High, -TGFB          | Tukey's test  | NS              |
| Low, -TGFB vs. Low, +TGFB           | Tukey's test  | <0.01           |
| Low, -TGFB vs. Moderate, +TGFB      | Tukey's test  | <0.05           |
| Low, -TGFB vs. High, +TGFB          | Tukey's test  | <0.01           |
| Moderate, -TGFB vs. High, -TGFB     | Tukey's test  | NS              |
| Moderate, -TGFB vs. Low, +TGFB      | Tukey's test  | <0.05           |
| Moderate, -TGFB vs. Moderate, +TGFB | Tukey's test  | NS (0.06)       |
| Moderate, -TGFB vs. High, +TGFB     | Tukey's test  | <0.05           |
| High, -TGFB vs. Low, +TGFB          | Tukey's test  | NS              |
| High, -TGFB vs. Moderate, +TGFB     | Tukey's test  | NS              |
| High, -TGFB vs. High, +TGFB         | Tukey's test  | NS (0.07)       |
| Low, +TGFB vs. Moderate, +TGFB      | Tukey's test  | NS              |

|                                     |               |           |
|-------------------------------------|---------------|-----------|
| Low, +TGFB vs. High, +TGFB          | Tukey's test  | NS        |
| Moderate, +TGFB vs. High, +TGFB     | Tukey's test  | NS        |
| <i>Subset: Day 5</i>                | One-way ANOVA | 3.1*10e-3 |
| Low, -TGFB vs. Moderate, -TGFB      | Tukey's test  | NS        |
| Low, -TGFB vs. High, -TGFB          | Tukey's test  | NS        |
| Low, -TGFB vs. Low, +TGFB           | Tukey's test  | NS        |
| Low, -TGFB vs. Moderate, +TGFB      | Tukey's test  | NS        |
| Low, -TGFB vs. High, +TGFB          | Tukey's test  | NS (0.06) |
| Moderate, -TGFB vs. High, -TGFB     | Tukey's test  | NS        |
| Moderate, -TGFB vs. Low, +TGFB      | Tukey's test  | <0.05     |
| Moderate, -TGFB vs. Moderate, +TGFB | Tukey's test  | <0.05     |
| Moderate, -TGFB vs. High, +TGFB     | Tukey's test  | <0.05     |
| High, -TGFB vs. Low, +TGFB          | Tukey's test  | NS        |
| High, -TGFB vs. Moderate, +TGFB     | Tukey's test  | NS        |
| High, -TGFB vs. High, +TGFB         | Tukey's test  | NS        |
| Low, +TGFB vs. Moderate, +TGFB      | Tukey's test  | NS        |
| Low, +TGFB vs. High, +TGFB          | Tukey's test  | NS        |
| Moderate, +TGFB vs. High, +TGFB     | Tukey's test  | NS        |

**Supplementary Table S4. Statistical analysis for  $\alpha$ SMA/actin coverage.** All data was normally distributed, as determined by the Kolmogorov-Smirnov test, and compared using one-way ANOVA, with *p*-values indicated below. In timepoints with ANOVA *p*-values <0.05, multiple comparisons were performed with Tukey's test, with *p*-values indicated below.

| <b>Comparison</b>                   | <b>Test</b>   | <b><i>p</i>-value</b> |
|-------------------------------------|---------------|-----------------------|
| <i>Subset: Day 1</i>                | One-way ANOVA | 5.6*10e-3             |
| Low, -TGFB vs. Moderate, -TGFB      | Tukey's test  | NS                    |
| Low, -TGFB vs. High, -TGFB          | Tukey's test  | NS                    |
| Low, -TGFB vs. Low, +TGFB           | Tukey's test  | NS                    |
| Low, -TGFB vs. Moderate, +TGFB      | Tukey's test  | NS                    |
| Low, -TGFB vs. High, +TGFB          | Tukey's test  | <0.01                 |
| Moderate, -TGFB vs. High, -TGFB     | Tukey's test  | NS                    |
| Moderate, -TGFB vs. Low, +TGFB      | Tukey's test  | NS                    |
| Moderate, -TGFB vs. Moderate, +TGFB | Tukey's test  | NS                    |
| Moderate, -TGFB vs. High, +TGFB     | Tukey's test  | <0.01                 |
| High, -TGFB vs. Low, +TGFB          | Tukey's test  | NS                    |
| High, -TGFB vs. Moderate, +TGFB     | Tukey's test  | NS                    |
| High, -TGFB vs. High, +TGFB         | Tukey's test  | <0.05                 |
| Low, +TGFB vs. Moderate, +TGFB      | Tukey's test  | NS                    |
| Low, +TGFB vs. High, +TGFB          | Tukey's test  | NS                    |
| Moderate, +TGFB vs. High, +TGFB     | Tukey's test  | NS                    |
| <i>Subset: Day 3</i>                | One-way ANOVA | 2.35*10e-19           |
| Low, -TGFB vs. Moderate, -TGFB      | Tukey's test  | NS                    |
| Low, -TGFB vs. High, -TGFB          | Tukey's test  | NS                    |
| Low, -TGFB vs. Low, +TGFB           | Tukey's test  | <0.00000003           |
| Low, -TGFB vs. Moderate, +TGFB      | Tukey's test  | <0.00000003           |
| Low, -TGFB vs. High, +TGFB          | Tukey's test  | <0.00000003           |
| Moderate, -TGFB vs. High, -TGFB     | Tukey's test  | <0.05                 |
| Moderate, -TGFB vs. Low, +TGFB      | Tukey's test  | <0.00000003           |

|                                     |               |             |
|-------------------------------------|---------------|-------------|
| Moderate, -TGFB vs. Moderate, +TGFB | Tukey's test  | <0.00000003 |
| Moderate, -TGFB vs. High, +TGFB     | Tukey's test  | <0.00000003 |
| High, -TGFB vs. Low, +TGFB          | Tukey's test  | <0.00000003 |
| High, -TGFB vs. Moderate, +TGFB     | Tukey's test  | <0.00000003 |
| High, -TGFB vs. High, +TGFB         | Tukey's test  | <0.00000003 |
| Low, +TGFB vs. Moderate, +TGFB      | Tukey's test  | NS          |
| Low, +TGFB vs. High, +TGFB          | Tukey's test  | NS          |
| Moderate, +TGFB vs. High, +TGFB     | Tukey's test  | NS          |
| <i>Subset: Day 5</i>                | One-way ANOVA | 8.36*10e-20 |
| Low, -TGFB vs. Moderate, -TGFB      | Tukey's test  | NS          |
| Low, -TGFB vs. High, -TGFB          | Tukey's test  | NS          |
| Low, -TGFB vs. Low, +TGFB           | Tukey's test  | <0.00000003 |
| Low, -TGFB vs. Moderate, +TGFB      | Tukey's test  | <0.00000003 |
| Low, -TGFB vs. High, +TGFB          | Tukey's test  | <0.00000003 |
| Moderate, -TGFB vs. High, -TGFB     | Tukey's test  | NS          |
| Moderate, -TGFB vs. Low, +TGFB      | Tukey's test  | <0.00000003 |
| Moderate, -TGFB vs. Moderate, +TGFB | Tukey's test  | <0.00000003 |
| Moderate, -TGFB vs. High, +TGFB     | Tukey's test  | <0.00000003 |
| High, -TGFB vs. Low, +TGFB          | Tukey's test  | <0.00000003 |
| High, -TGFB vs. Moderate, +TGFB     | Tukey's test  | <0.00000003 |
| High, -TGFB vs. High, +TGFB         | Tukey's test  | <0.00000003 |
| Low, +TGFB vs. Moderate, +TGFB      | Tukey's test  | NS          |
| Low, +TGFB vs. High, +TGFB          | Tukey's test  | NS          |
| Moderate, +TGFB vs. High, +TGFB     | Tukey's test  | NS          |

**Supplementary Table S5. Statistical analysis for ACTA2 relative gene expression.** All data was normally distributed, as determined by the Kolmogorov-Smirnov test, and compared using one-way ANOVA, with *p*-values indicated below. In timepoints with ANOVA *p*-values <0.05, multiple comparisons were performed with Tukey's test, with *p*-values indicated below.

| <b>Comparison</b>                   | <b>Test</b>   | <b><i>p</i>-value</b> |
|-------------------------------------|---------------|-----------------------|
| <i>Subset: Day 1</i>                | One-way ANOVA | 1.84*10e-7            |
| Low, -TGFB vs. Moderate, -TGFB      | Tukey's test  | NS                    |
| Low, -TGFB vs. High, -TGFB          | Tukey's test  | NS                    |
| Low, -TGFB vs. Low, +TGFB           | Tukey's test  | <0.00003              |
| Low, -TGFB vs. Moderate, +TGFB      | Tukey's test  | <0.001                |
| Low, -TGFB vs. High, +TGFB          | Tukey's test  | <0.00005              |
| Moderate, -TGFB vs. High, -TGFB     | Tukey's test  | NS                    |
| Moderate, -TGFB vs. Low, +TGFB      | Tukey's test  | <0.00003              |
| Moderate, -TGFB vs. Moderate, +TGFB | Tukey's test  | <0.0006               |
| Moderate, -TGFB vs. High, +TGFB     | Tukey's test  | <0.00003              |
| High, -TGFB vs. Low, +TGFB          | Tukey's test  | <0.00003              |
| High, -TGFB vs. Moderate, +TGFB     | Tukey's test  | <0.001                |
| High, -TGFB vs. High, +TGFB         | Tukey's test  | <0.00006              |
| Low, +TGFB vs. Moderate, +TGFB      | Tukey's test  | NS                    |
| Low, +TGFB vs. High, +TGFB          | Tukey's test  | NS                    |
| Moderate, +TGFB vs. High, +TGFB     | Tukey's test  | NS                    |
| <i>Subset: Day 3</i>                | One-way ANOVA | 1.26*10e-4            |
| Low, -TGFB vs. Moderate, -TGFB      | Tukey's test  | NS                    |

|                                     |              |           |
|-------------------------------------|--------------|-----------|
| Low, -TGFB vs. High, -TGFB          | Tukey's test | NS        |
| Low, -TGFB vs. Low, +TGFB           | Tukey's test | <0.005    |
| Low, -TGFB vs. Moderate, +TGFB      | Tukey's test | <0.05     |
| Low, -TGFB vs. High, +TGFB          | Tukey's test | <0.005    |
| Moderate, -TGFB vs. High, -TGFB     | Tukey's test | NS        |
| Moderate, -TGFB vs. Low, +TGFB      | Tukey's test | <0.005    |
| Moderate, -TGFB vs. Moderate, +TGFB | Tukey's test | <0.05     |
| Moderate, -TGFB vs. High, +TGFB     | Tukey's test | <0.005    |
| High, -TGFB vs. Low, +TGFB          | Tukey's test | <0.01     |
| High, -TGFB vs. Moderate, +TGFB     | Tukey's test | NS (0.06) |
| High, -TGFB vs. High, +TGFB         | Tukey's test | <0.01     |
| Low, +TGFB vs. Moderate, +TGFB      | Tukey's test | NS        |
| Low, +TGFB vs. High, +TGFB          | Tukey's test | NS        |
| Moderate, +TGFB vs. High, +TGFB     | Tukey's test | NS        |

**Supplementary Table S6. Statistical analysis for *POSTN* relative gene expression.** All data was normally distributed, as determined by the Kolmogorov-Smirnov test, and compared using one-way ANOVA, with *p*-values indicated below. In timepoints with ANOVA *p*-values <0.05, multiple comparisons were performed with Tukey's test, with *p*-values indicated below.

| Comparison                          | Test          | <i>p</i> -value |
|-------------------------------------|---------------|-----------------|
| <i>Subset: Day 1</i>                | One-way ANOVA | 9.8*10e-3       |
| Low, -TGFB vs. Moderate, -TGFB      | Tukey's test  | NS              |
| Low, -TGFB vs. High, -TGFB          | Tukey's test  | NS              |
| Low, -TGFB vs. Low, +TGFB           | Tukey's test  | NS              |
| Low, -TGFB vs. Moderate, +TGFB      | Tukey's test  | <0.05           |
| Low, -TGFB vs. High, +TGFB          | Tukey's test  | NS              |
| Moderate, -TGFB vs. High, -TGFB     | Tukey's test  | NS              |
| Moderate, -TGFB vs. Low, +TGFB      | Tukey's test  | NS (0.08)       |
| Moderate, -TGFB vs. Moderate, +TGFB | Tukey's test  | <0.05           |
| Moderate, -TGFB vs. High, +TGFB     | Tukey's test  | NS              |
| High, -TGFB vs. Low, +TGFB          | Tukey's test  | NS              |
| High, -TGFB vs. Moderate, +TGFB     | Tukey's test  | NS              |
| High, -TGFB vs. High, +TGFB         | Tukey's test  | NS              |
| Low, +TGFB vs. Moderate, +TGFB      | Tukey's test  | NS              |
| Low, +TGFB vs. High, +TGFB          | Tukey's test  | NS              |
| Moderate, +TGFB vs. High, +TGFB     | Tukey's test  | NS              |
| <i>Subset: Day 3</i>                | One-way ANOVA | NS (0.51)       |

**Supplementary Table S7. Statistical analysis for *FAP* relative gene expression.** All data was normally distributed, as determined by the Kolmogorov-Smirnov test, and compared using one-way ANOVA, with *p*-values indicated below. In timepoints with ANOVA *p*-values <0.05, multiple comparisons were performed with Tukey's test, with *p*-values indicated below.

| Comparison                     | Test          | <i>p</i> -value |
|--------------------------------|---------------|-----------------|
| <i>Subset: Day 1</i>           | One-way ANOVA | NS (0.051)      |
| <i>Subset: Day 3</i>           | One-way ANOVA | 9.0*10e-3       |
| Low, -TGFB vs. Moderate, -TGFB | Tukey's test  | NS              |
| Low, -TGFB vs. High, -TGFB     | Tukey's test  | NS              |

|                                     |              |           |
|-------------------------------------|--------------|-----------|
| Low, -TGFB vs. Low, +TGFB           | Tukey's test | NS (0.06) |
| Low, -TGFB vs. Moderate, +TGFB      | Tukey's test | NS        |
| Low, -TGFB vs. High, +TGFB          | Tukey's test | NS        |
| Moderate, -TGFB vs. High, -TGFB     | Tukey's test | NS        |
| Moderate, -TGFB vs. Low, +TGFB      | Tukey's test | <0.05     |
| Moderate, -TGFB vs. Moderate, +TGFB | Tukey's test | <0.05     |
| Moderate, -TGFB vs. High, +TGFB     | Tukey's test | NS        |
| High, -TGFB vs. Low, +TGFB          | Tukey's test | NS        |
| High, -TGFB vs. Moderate, +TGFB     | Tukey's test | NS        |
| High, -TGFB vs. High, +TGFB         | Tukey's test | NS        |
| Low, +TGFB vs. Moderate, +TGFB      | Tukey's test | NS        |
| Low, +TGFB vs. High, +TGFB          | Tukey's test | NS        |
| Moderate, +TGFB vs. High, +TGFB     | Tukey's test | NS        |

**Supplementary Table S8. Statistical analysis for *FSPI* relative gene expression.** All data was normally distributed, as determined by the Kolmogorov-Smirnov test, and compared using one-way ANOVA, with *p*-values indicated below. In timepoints with ANOVA *p*-values <0.05, multiple comparisons were performed with Tukey's test, with *p*-values indicated below.

| Comparison                          | Test          | <i>p</i> -value |
|-------------------------------------|---------------|-----------------|
| <i>Subset: Day 1</i>                | One-way ANOVA | 8.71*10e-4      |
| Low, -TGFB vs. Moderate, -TGFB      | Tukey's test  | NS              |
| Low, -TGFB vs. High, -TGFB          | Tukey's test  | NS              |
| Low, -TGFB vs. Low, +TGFB           | Tukey's test  | <0.05           |
| Low, -TGFB vs. Moderate, +TGFB      | Tukey's test  | NS              |
| Low, -TGFB vs. High, +TGFB          | Tukey's test  | <0.05           |
| Moderate, -TGFB vs. High, -TGFB     | Tukey's test  | NS              |
| Moderate, -TGFB vs. Low, +TGFB      | Tukey's test  | NS (0.08)       |
| Moderate, -TGFB vs. Moderate, +TGFB | Tukey's test  | NS              |
| Moderate, -TGFB vs. High, +TGFB     | Tukey's test  | NS              |
| High, -TGFB vs. Low, +TGFB          | Tukey's test  | <0.005          |
| High, -TGFB vs. Moderate, +TGFB     | Tukey's test  | <0.05           |
| High, -TGFB vs. High, +TGFB         | Tukey's test  | <0.01           |
| Low, +TGFB vs. Moderate, +TGFB      | Tukey's test  | NS              |
| Low, +TGFB vs. High, +TGFB          | Tukey's test  | NS              |
| Moderate, +TGFB vs. High, +TGFB     | Tukey's test  | NS              |
| <i>Subset: Day 3</i>                | One-way ANOVA | NS (0.14)       |

**Supplementary Table S9. Statistical analysis for *GJAI* relative gene expression.** All data was normally distributed, as determined by the Kolmogorov-Smirnov test, and compared using one-way ANOVA, with *p*-values indicated below.

| Comparison           | Test          | <i>p</i> -value |
|----------------------|---------------|-----------------|
| <i>Subset: Day 1</i> | One-way ANOVA | NS (0.60)       |
| <i>Subset: Day 3</i> | One-way ANOVA | NS (0.079)      |

**Supplementary Table S10. Statistical analysis for cell density after re-plating.** All data was normally distributed, as determined by the Kolmogorov-Smirnov test, and compared using one-

way ANOVA, with  $p$ -value of  $4.06 \times 10^{-1}$ . Multiple comparisons were performed with Tukey's test, with  $p$ -values indicated below.

| Comparison                    | Test         | $p$ -value |
|-------------------------------|--------------|------------|
| Day 2, -TGFB vs. Day 2, +TGFB | Tukey's test | NS         |
| Day 2, -TGFB vs. Day 7, -TGFB | Tukey's test | NS         |
| Day 2, -TGFB vs. Day 7, +TGFB | Tukey's test | NS         |
| Day 2, +TGFB vs. Day 7, -TGFB | Tukey's test | NS         |
| Day 2, +TGFB vs. Day 7, +TGFB | Tukey's test | NS         |
| Day 7, -TGFB vs. Day 7, +TGFB | Tukey's test | NS         |

**Supplementary Table S11. Statistical analysis for actin coverage after re-plating.** All data was normally distributed, as determined by the Kolmogorov-Smirnov test, and compared using one-way ANOVA, with  $p$ -value of  $2.5 \times 10^{-4}$ . Multiple comparisons were performed with Tukey's test, with  $p$ -values indicated below.

| Comparison                    | Test         | $p$ -value |
|-------------------------------|--------------|------------|
| Day 2, -TGFB vs. Day 2, +TGFB | Tukey's test | <0.05      |
| Day 2, -TGFB vs. Day 7, -TGFB | Tukey's test | NS         |
| Day 2, -TGFB vs. Day 7, +TGFB | Tukey's test | NS         |
| Day 2, +TGFB vs. Day 7, -TGFB | Tukey's test | <0.0003    |
| Day 2, +TGFB vs. Day 7, +TGFB | Tukey's test | NS (0.085) |
| Day 7, -TGFB vs. Day 7, +TGFB | Tukey's test | <0.05      |

**Supplementary Table S12. Statistical analysis for  $\alpha$ SMA/actin coverage after re-plating.** All data was normally distributed, as determined by the Kolmogorov-Smirnov test, and compared using one-way ANOVA, with  $p$ -value of  $2.19 \times 10^{-5}$ . Multiple comparisons were performed with Tukey's test, with  $p$ -values indicated below.

| Comparison                    | Test         | $p$ -value |
|-------------------------------|--------------|------------|
| Day 2, -TGFB vs. Day 2, +TGFB | Tukey's test | <0.0003    |
| Day 2, -TGFB vs. Day 7, -TGFB | Tukey's test | NS         |
| Day 2, -TGFB vs. Day 7, +TGFB | Tukey's test | <0.0006    |
| Day 2, +TGFB vs. Day 7, -TGFB | Tukey's test | <0.001     |
| Day 2, +TGFB vs. Day 7, +TGFB | Tukey's test | NS         |
| Day 7, -TGFB vs. Day 7, +TGFB | Tukey's test | <0.0019    |
